# Supplementary material for: Urinary lead concentration and composition of the adult gut microbiota in a cross-sectional population-based sample
Source: PubMed Central journal article supplement — Environ Int. Author manuscript; Available in PMC 2020 May 17. (PMC7230144; doi:10.1016/j.envint.2019.105122), 2019-09-10
Supplement: NIHMS1065704-supplement-Suppl.pdf [file NIHMS1065704-supplement-Suppl.pdf]

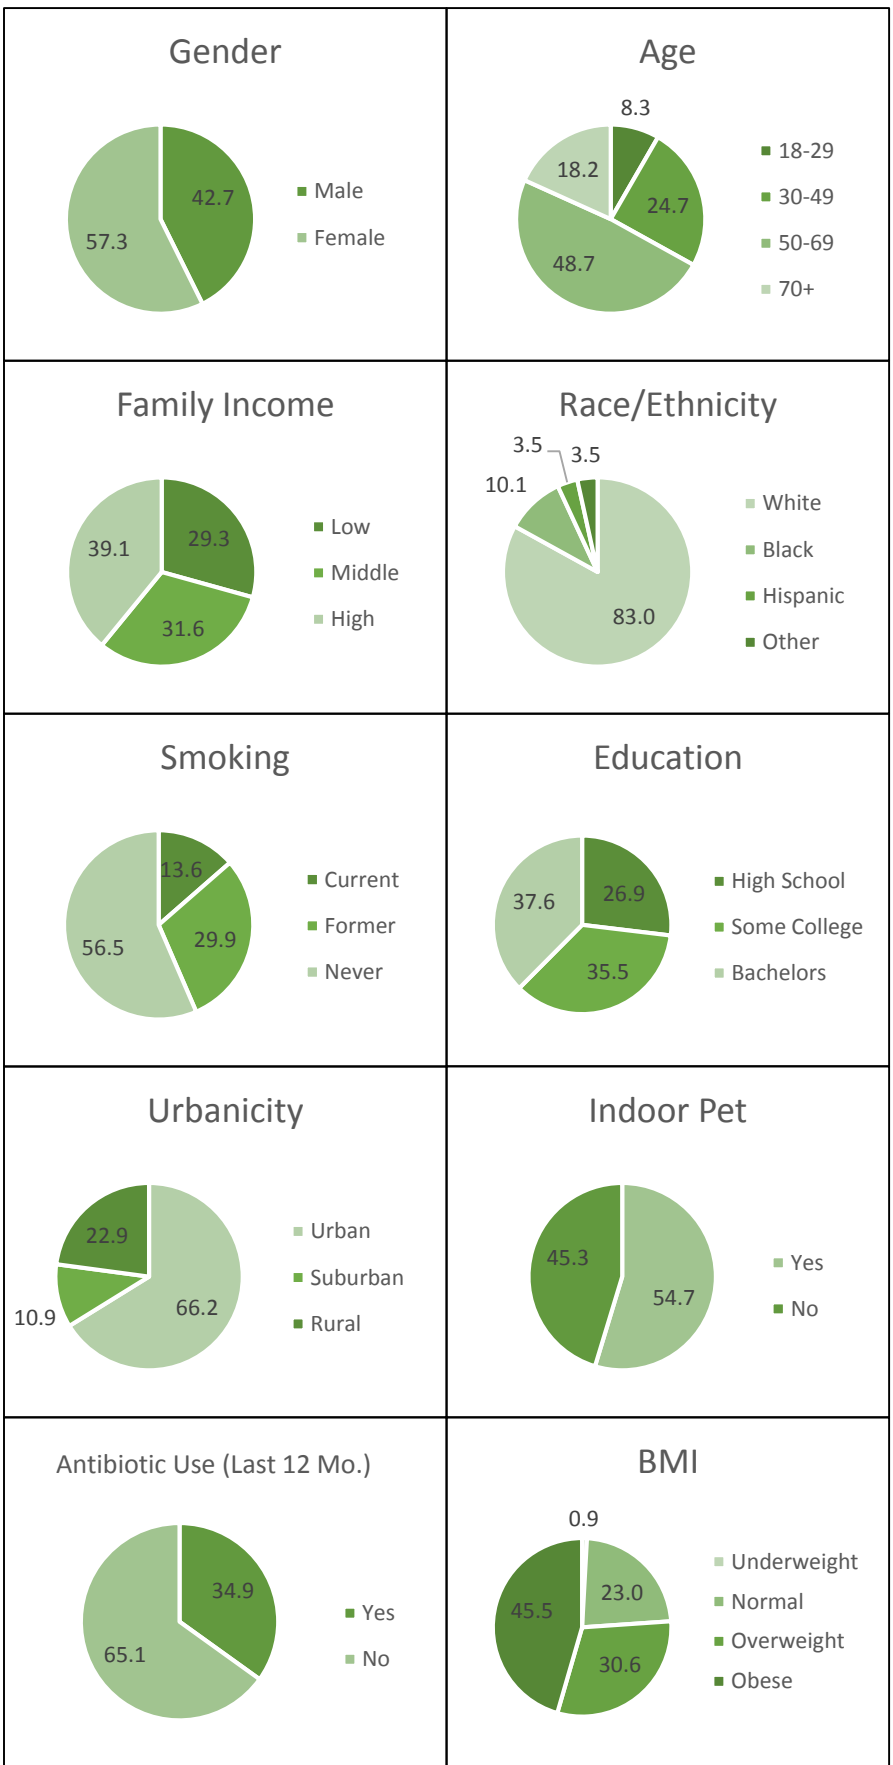

**Figure S1.** Distribution of demographic characteristics throughout the study population as a whole.
